# Supplementary material for: Thermally responsive microlens arrays fabricated with the use of defect arrays in a smectic liquid crystal
Source: Royal Society of Chemistry journal article supplement (doi:10.1039/c2ra20561k), 2012-01-01
Supplement: c2ra20561k.pdf [file c2ra20561k.pdf]

## Supporting information

# Thermally Responsive Microlens Arrays fabricated with the use of Defects arrays in a Smectic Liquid Crystal

*Jung Hyun Kim,<sup>a</sup> Yun Ho Kim,<sup>a,b</sup> Hyeon Su Jeong,<sup>a</sup> Mohan Srinivasarao<sup>c</sup> and Hee-Tae Jung<sup>a,\*</sup>*

*<sup>a</sup> Department of Chemical and Biomolecular Engineering, Korea Advanced Institute of Science and  
Technology (KAIST), 335 Gwahangno, Yuseong-gu, Daejeon 305-701, Korea*

*<sup>b</sup> Advanced Functional Materials Research Group, Korea Research Institute of Chemical Technology,  
Daejeon 305-600, Korea*

*<sup>c</sup> School of Materials Science and Engineering, School of Chemistry and Biochemistry, Georgia  
Institute of Technology, Atlanta, GA 30022*

Author E-mail Address: [heetae@kaist.ac.kr](mailto:heetae@kaist.ac.kr)

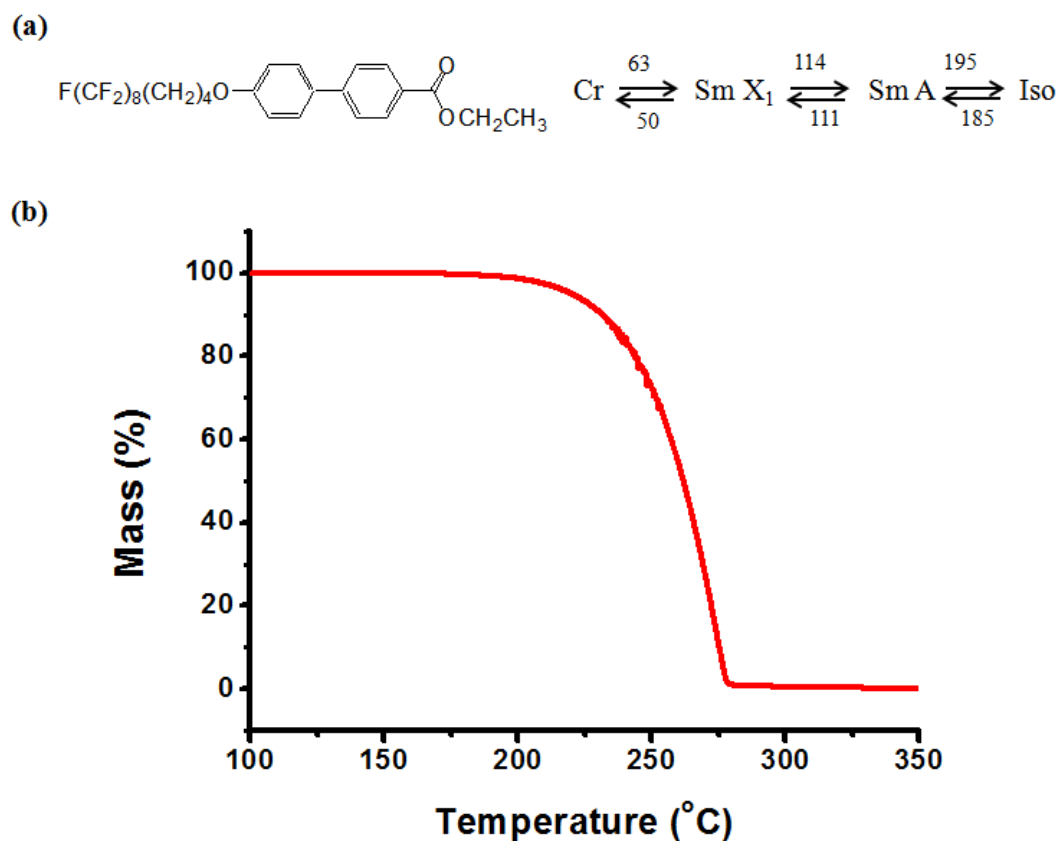

S1. (a) The molecular structure and the phase transition temperature of the smectic LC compound having sublimation problem. (b) Thermogravimetric analysis (TGA) data of (a) material. As shown in TGA data, sublimation starts to occur near 156°C in smectic region of the material and the rate of sublimation is fast.

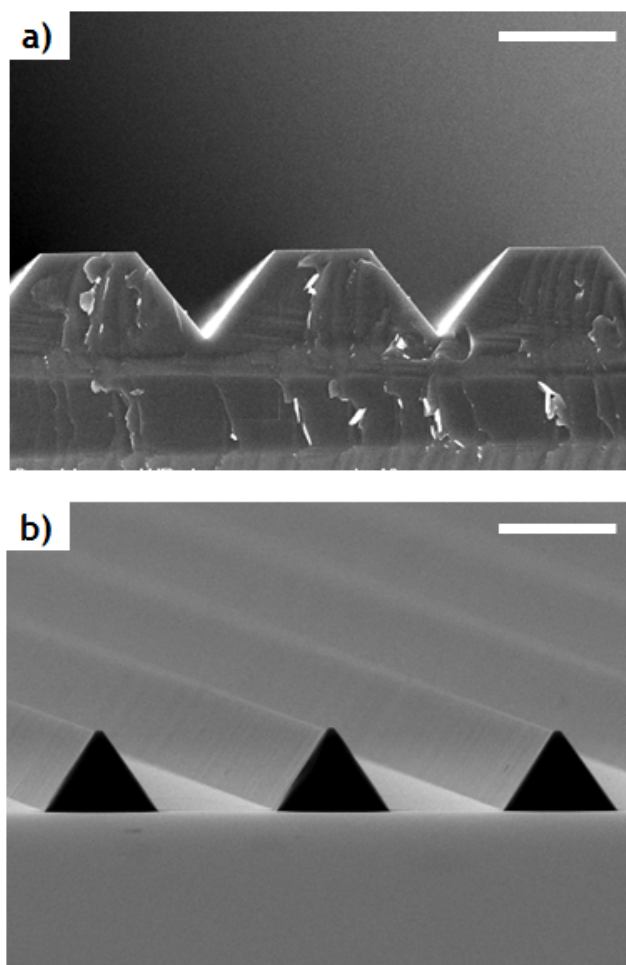

Fig. S2. a) The scanning electron microscopy (SEM) images of Si V-shaped microchannels, b) NOA65 trapezoidal microchannel (Scale: 10 $\mu$ m).

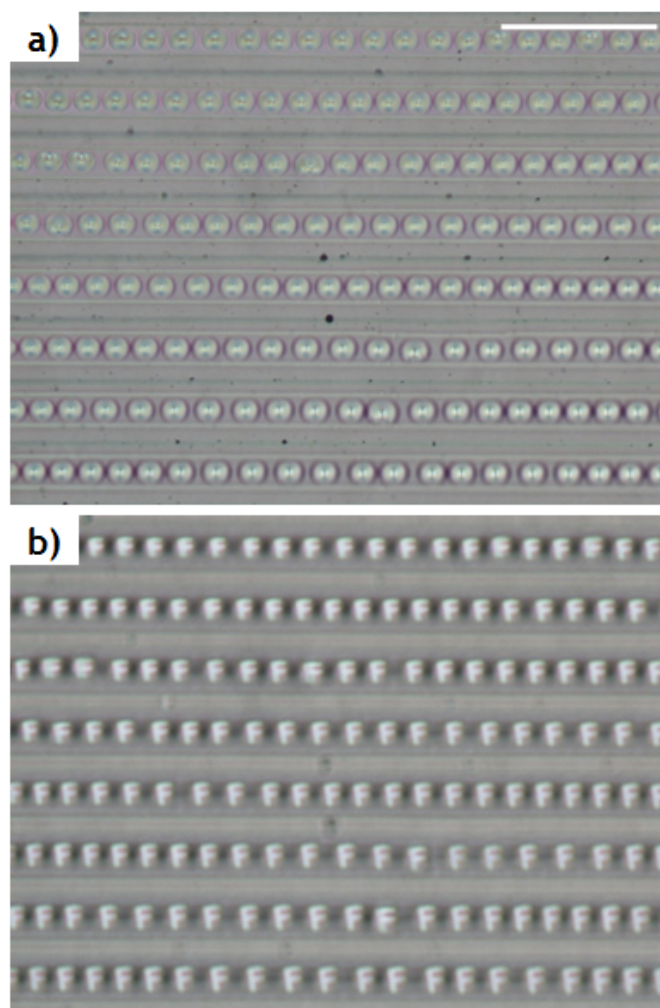

Fig. S3. a) Optical microscope (OM) images of MLAs at  $z=0$ . At  $z=0$ , non-diffracted image of the MLA was captured. b) The letter “F” was clearly observed when the focal point of the objective lens was adjusted upwards to match the focal plane of the MLAs. (Scale:  $50\mu\text{m}$ ).

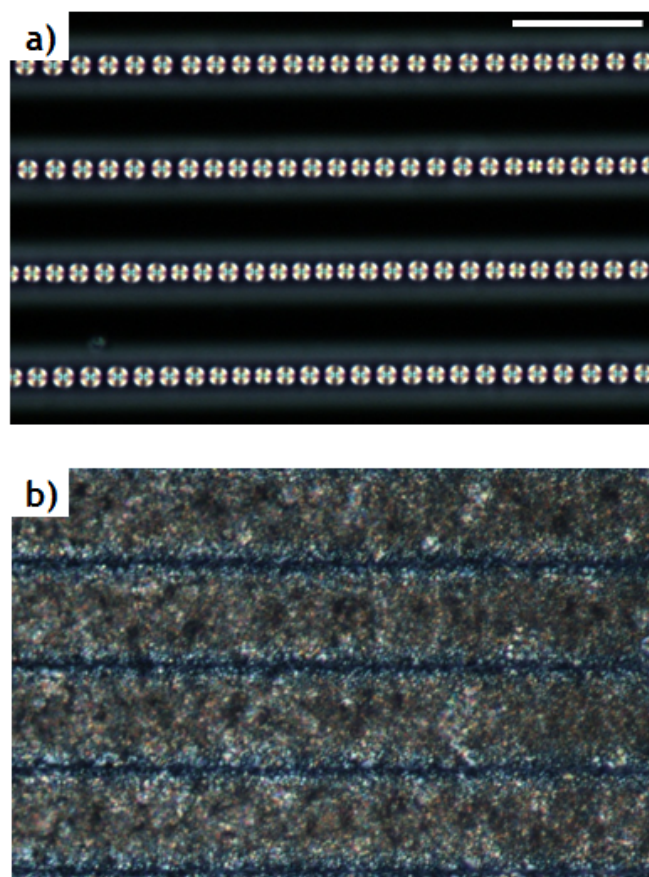

Fig. S4. Polarized optical microscope (POM) images of MLAs a) at 30°C and b) -10°C (Scale: 50 $\mu$ m).
